# Supplementary material
Source: publisher figshare collection journal article supplement (https://sage.figshare.com/ndownloader/files/34349780)
Supplement: Supplementary file 1 [file 34349780]

**Appendix B: Speakers’ language backgrounds**

Figure B1 plots the speakers’ language dominance score against their percentage of prepositional phrases in the postfield position. Table B1 and B2 provide additional information about these speakers.

[insert Figure B1.]

Figure B1: Language dominance score and percentage of PPs in the postfield position. Scores below 0 indicate dominance in German, scores above 0 dominance in Dutch. Numbers and letters represent individual participants’ scores. Numbers = native German speakers, letters = native Dutch speakers.

Table B1: Information about the native German speakers

| **Speaker** | **Information** |
| --- | --- |
| 1 | - Length of stay in NL: 8 years - Age of migration: 32 years - Age of acquisition Dutch: 32 years   Speaker 1 moved to the Netherlands because she met her Dutch husband. She didn’t speak Dutch at this point, but took several Dutch classes in the coming years. She and her husband now have two sons and they live together in the Netherlands close to the German border. Speaker 1 indicates to be in regular contact with her family in Germany and to visit them approximately three times a year. |
| 2 | - Length of stay in NL: 2 years - Age of migration: 21 years - Age of acquisition Dutch: 21 years   Speaker 2 moved to the Netherlands when she was 21 to marry her Dutch husband. That’s also when she started to learn Dutch. Now, she has been living in the Netherlands for a bit more than two years. She still is in regular contact with her family, but as her family does not live close to the Dutch border, she only visits them irregularly. |
| 3 | - Length of stay in NL: 5 years - Age of migration: 18 years - Age of acquisition Dutch: 15 years   Speaker 3 grew up in Germany close to the Dutch border. She already took some Dutch courses in high school, before she moved to the Netherlands to study. She now lives together with her Dutch boyfriend and she still is in regular contact with her family in Germany. |
| 4 | - Length of stay in NL: 8 years - Age of migration: 24 years - Age of acquisition Dutch: 8 years   Speaker 4 indicates that she already learned some Dutch as a child because her family spent all their holidays in the Netherlands. She migrated to the Netherlands when she was 24 years old to live together with her Dutch boyfriend, who is now her husband. They speak Dutch to each other. She still is in regular contact with her family in Germany and visits them around four times a year. |
| 5 | - Length of stay in NL: 22 years - Age of migration: 33 years - Age of acquisition Dutch: 33 years   Speaker 5 migrated to the Netherlands when she was 33 years old and has now been living in the Netherlands for 22 years. She indicates to still be in regular contact with her family living in Germany and to visit them approximately four times a year. |
| 6 | - Length of stay in NL: 21 years - Age of migration: 35 years - Age of acquisition Dutch: 35 years   Speaker 6 moved to the Netherlands when she was 35 years old because she started to live together with her Dutch boyfriend, who is now her husband. After migrating, she took several language classes to learn Dutch. Now, she mostly uses Dutch in her everyday life. At the same time, she indicates to still be in regular contact with her family in Germany and to visit them approximately four times a year. |
| 7 | - Length of stay in NL: 6 years - Age of migration: 23 years - Age of acquisition Dutch: 23 years   This speaker moved to the Netherlands when she was 23 years old. Before that, she had spent several months in the Netherlands for work. That was when she met her Dutch boyfriend. She started to learn Dutch after she moved to the Netherlands, mainly by reading a lot of Dutch books. |
| 8 | - Length of stay in NL: 17 years - Age of migration: 40 years - Age of acquisition Dutch: 1 years   Speaker 8 migrated to the Netherlands when she was 40 years old. Before that, she had lived together with her Dutch husband in Germany for a couple of years. They have two daughters, who they raised bilingually in Dutch and German. Speaker B indicates that she mostly uses German when talking to her family, which means that the German that she is exposed to likely is a German variety that is already influenced by Dutch. In fact, one of her daughters coincidentally also worked in the same customer service department, which allowed us to also inspect her use of the postfield position. She used that position in around 29.9% of the cases, which is one of the highest percentages overall. |
| 9 | - Length of stay in NL: 26 years - Age of migration: 23 years - Age of acquisition Dutch: 23 years   Speaker 9 migrated to the Netherlands when she was 23 years old when she married her Dutch husband. They now live close to the German border and speaker 9 indicates to be in Germany approximately once a month. |

Table B2: Information about the native Dutch speakers

| Speaker | AoA of German | Lived in DE? | Visiting DE? |
| --- | --- | --- | --- |
| A | 14 | This speakers has been living in Germany for 44 years. | |
| B | 4 | No | 1x per week |
| C | 4 | No | Never |
| D | 4 | No | 1x per year |
| E | 12 | No | Never |
| F | 12 | 5 months | 3x per month |
| G | 0 | 3 months | 3x per year |
| H | 16 | 12 years | 2x per year |
| I | 4 | 6 months | 1x per year |
| J | 12 | No | 1x per year |
| K | 7 | 11 years | 2x per month |
| L | 2 | No | 5x per year |
| M | 8 | No | 4x per year |
| N | 20 | No | 3x per year |
| O | 20 | No | Never |
| P | 12 | No | 1x per year |
| Q | 13 | No | Never |
| R | 13 | 6 months | Never |
| S | 13 | No | 1x per year |
| T | 12 | No | Never |
| U | 12 | No | Never |
